# Supplementary material for: Novel dioxolene nickel complexes with sterically hindered diazabutadienes. Coupling of aza-ligands coordinated to nickel
Source: Royal Society of Chemistry journal article supplement (doi:10.1039/c9dt01309a), 2019-01-01
Supplement: c9dt01309a1.pdf [file c9dt01309a1.pdf]

Supporting information

to the paper Novel dioxolene nickel complexes with sterically hindered diazabutadienes. Coupling of aza-ligands coordinated to nickel by Michael P. Bubnov, Irina A. Teplova, Nickolay O. Druzhkov, Ivan D. Grishin, Evgenii V. Baranov, Artem S. Bogomyakov, Vladimir K. Cherkasov and Gleb. A. Abakumov.

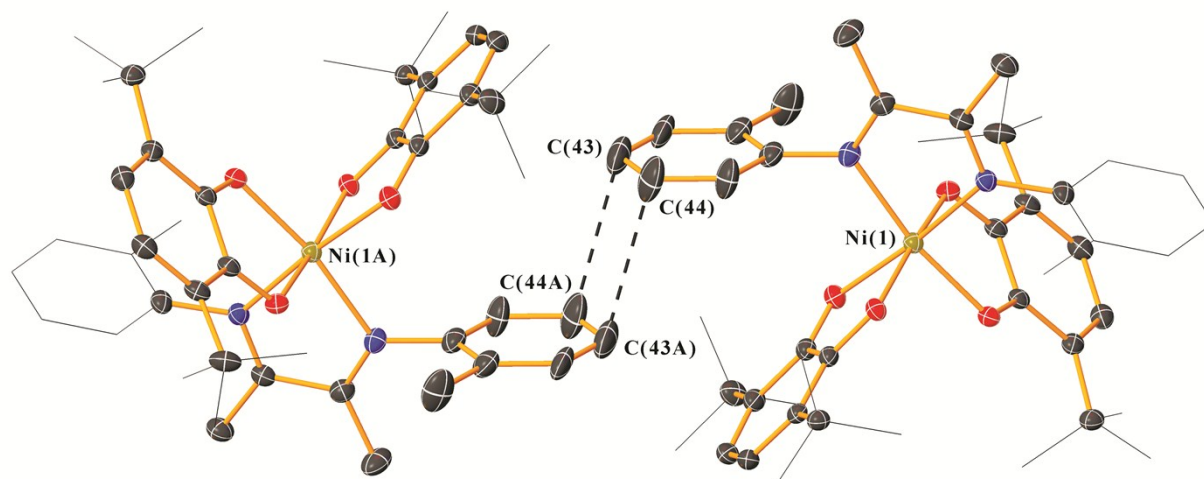

SI Figure 1. Intermolecular contacts between adjacent molecules in 1.
